# Supplementary material for: Targeting Penicillium expansum GMC Oxidoreductase with High Affinity Small Molecules for Reducing Patulin Production
Source: PubMed Central journal article supplement (PMC7824139; doi:10.3390/biology10010021), 2020-12-31
Supplement: biology-10-00021-s001.pdf [file biology-10-00021-s001.pdf]

Supp. Figure S1: *In vitro/in vivo* viability/infection assays. Colony growth after 12 days post-inoculation (dpi) of *P. expansum* on PDA medium amended with buffer solution (positive control, A), water (negative control, B), 1 mM meticrane (C), 1 mM 6-hydroxycoumarin (D), 1 mM *p*-anisic acid (E). *P. expansum* lesion diameters on positive (buffer, F) and negative (water, G) control apples at 8 dpi. Lesion diameters at 8 dpi on apples treated by meticrane, 6-hydroxycoumarin and *p*-anisic acid (100 µg/wound for all the three compounds) (H-J).

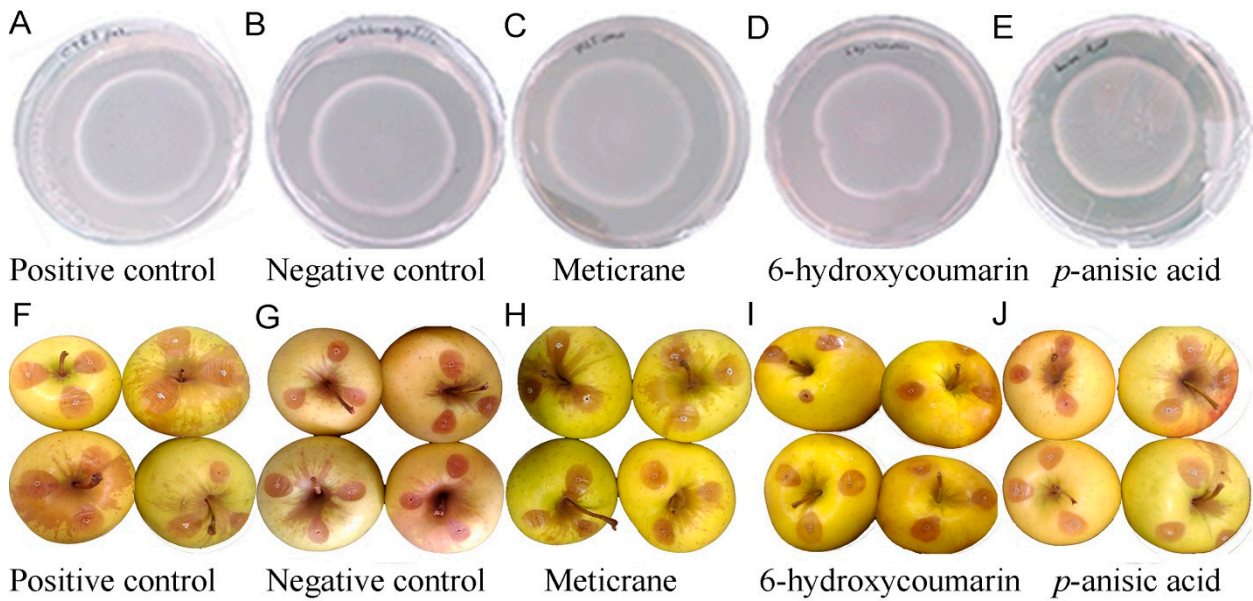

Supp. Table S1: List of residues within 4 Å from the crystallized or docked ligands within the indicated homologous crystallized structures sampled by using pGenThreader and I-tasser, for comparative modelling purposes. In the last column, residues of the 3D comparative model of the investigated *P. expansum* GMC oxidoreductase (PatE, patulin synthase) within 4 Å from the docked patulin are reported.

| Protein             | <i>Pleurotus eryngii</i> , aryl-alcohol oxidase (5oc1.pdb) | <i>Mesorhizobium loti</i> , pyridoxine 4-oxidase (4ha6.pdb) | <i>Chlorella variabilis</i> , fatty acid photodecarboxylase (5ncc.pdb) | <i>Prunus dulcis</i> , endo-deglycosylated hydroxynitrile lyase isozyme 5 (6lqy.pdb) | <i>Prunus dulcis</i> , hydroxynitrile lyase (3gdn.pdb) | <i>P. expansum</i> , GMC oxidoreductase (comparative 3D model) |
|---------------------|------------------------------------------------------------|-------------------------------------------------------------|------------------------------------------------------------------------|--------------------------------------------------------------------------------------|--------------------------------------------------------|----------------------------------------------------------------|
| Crystallized ligand | 4-methoxybenzoic acid (ANN)                                | pyridoxamine (PXM)                                          | palmitate (PLM)                                                        | benzaldehyde (HBX)                                                                   | benzaldehyde (HBX)                                     | patulin                                                        |
| Residues            |                                                            |                                                             |                                                                        |                                                                                      |                                                        | Gln100                                                         |
| Residues            |                                                            |                                                             |                                                                        |                                                                                      |                                                        | Tyr104                                                         |
| Residues            |                                                            | Trp64                                                       | Ile130                                                                 |                                                                                      |                                                        |                                                                |
| Residues            |                                                            |                                                             |                                                                        |                                                                                      |                                                        | Ans148                                                         |
| Residues            | Tyr92                                                      | Ala105                                                      | Ala171                                                                 | Ala111                                                                               | Ala111                                                 | Tyr149                                                         |
| Residues            |                                                            |                                                             |                                                                        |                                                                                      |                                                        | Ala151                                                         |
| Residues            |                                                            |                                                             |                                                                        | Arg301                                                                               |                                                        |                                                                |
| Residues            |                                                            |                                                             | Leu386                                                                 |                                                                                      |                                                        |                                                                |
| Residues            |                                                            |                                                             |                                                                        |                                                                                      | Val316                                                 |                                                                |
| Residues            |                                                            | Ser330                                                      |                                                                        |                                                                                      |                                                        |                                                                |
| Residues            | Ile357                                                     |                                                             |                                                                        |                                                                                      |                                                        |                                                                |
| Residues            |                                                            |                                                             |                                                                        | Val329                                                                               | Cys328                                                 |                                                                |
| Residues            |                                                            |                                                             |                                                                        | Leu331                                                                               | Phe 330                                                |                                                                |
| Residues            |                                                            | Arg451                                                      |                                                                        |                                                                                      |                                                        |                                                                |
| Residues            |                                                            | Val453                                                      |                                                                        |                                                                                      |                                                        |                                                                |
| Residues            |                                                            | Gly455                                                      |                                                                        |                                                                                      |                                                        |                                                                |
| Residues            |                                                            | Met456                                                      |                                                                        |                                                                                      |                                                        |                                                                |
| Residues            |                                                            | Ala457                                                      |                                                                        |                                                                                      |                                                        |                                                                |
| Residues            |                                                            |                                                             |                                                                        |                                                                                      | Phe342                                                 |                                                                |
| Residues            |                                                            | Gly462                                                      |                                                                        |                                                                                      |                                                        |                                                                |
| Residues            | Ile391                                                     |                                                             |                                                                        |                                                                                      |                                                        | Tyr453                                                         |
| Residues            |                                                            |                                                             | Thr465                                                                 |                                                                                      |                                                        |                                                                |
| Residues            | Ser393                                                     |                                                             | Tyr466                                                                 |                                                                                      |                                                        |                                                                |
| Residues            |                                                            |                                                             | Phe469                                                                 |                                                                                      |                                                        |                                                                |
| Residues            | Phe397                                                     |                                                             |                                                                        |                                                                                      |                                                        |                                                                |
| Residues            |                                                            |                                                             | Thr484                                                                 | His358                                                                               | His357                                                 |                                                                |
| Residues            | Thr413                                                     |                                                             | Gln486                                                                 |                                                                                      |                                                        |                                                                |
| Residues            | Ile500                                                     | His460                                                      |                                                                        | Tyr458                                                                               | Tyr457                                                 | Ile562                                                         |
| Residues            | Phe501                                                     | His461                                                      | Ans575                                                                 | Trp459                                                                               | Trp458                                                 | Phe563                                                         |
| Residues            | His502                                                     | His462                                                      |                                                                        |                                                                                      |                                                        | His564                                                         |
| Residues            | His546                                                     | Pro504                                                      |                                                                        | His498                                                                               | His497                                                 | His608                                                         |

Supp. Table S2: List of 10 small molecules chosen among the first 20 best hits based on the lowest calculated binding energy, on the presence of aromatic moieties and on their similarity with patulin and (*E*)-ascladiol.

| Rank | Chemical code | Structure                                                                           | Name                          | Binding energy (kcal/mol) | ChEMBL                                                                                                                                                                                | Indication             |
|------|---------------|-------------------------------------------------------------------------------------|-------------------------------|---------------------------|---------------------------------------------------------------------------------------------------------------------------------------------------------------------------------------|------------------------|
| 1    | D01896        | 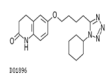   | Cilostazol                    | -9.47                     | <a href="https://www.ebi.ac.uk/chembl/compound_report_card/CHEMBL799/">https://www.ebi.ac.uk/chembl/compound_report_card/CHEMBL799/</a>                                               | Cardiovascular agent   |
| 2    | D00848        |    | Dextromethorphan hydrobromide | -9.19                     | <a href="https://www.ebi.ac.uk/chembl/compound_report_card/CHEMBL1256818/">https://www.ebi.ac.uk/chembl/compound_report_card/CHEMBL1256818/</a>                                       | Neuropsychiatric agent |
| 3    | D01506        |    | Dimemorfan phosphate          | -9.01                     | <a href="https://www.ebi.ac.uk/chembl/compound_report_card/CHEMBL2106325/">https://www.ebi.ac.uk/chembl/compound_report_card/CHEMBL2106325/</a>                                       | Antitussive            |
| 7    | D03648        |    | Dapoxetine hydrochloride      | -8.74                     | <a href="https://www.ebi.ac.uk/chembl/g/#search_results/all/query=Dapoxetine%20hydrochloride">https://www.ebi.ac.uk/chembl/g/#search_results/all/query=Dapoxetine%20hydrochloride</a> | Neuropsychiatric agent |
| 8    | D00381        |    | Tolnaftate                    | -8.73                     | <a href="https://www.ebi.ac.uk/chembl/compound_report_card/CHEMBL83668/">https://www.ebi.ac.uk/chembl/compound_report_card/CHEMBL83668/</a>                                           | Antifungal agent       |
| 12   | D00653        |    | Dorzolamide hydrochloride     | -8.6                      | <a href="https://www.ebi.ac.uk/chembl/compound_report_card/CHEMBL1201162/">https://www.ebi.ac.uk/chembl/compound_report_card/CHEMBL1201162/</a>                                       | Cardiovascular agent   |
| 13   | D01876        |   | Pipradrol hydrochloride       | -8.6                      | <a href="https://www.ebi.ac.uk/chembl/compound_report_card/CHEMBL2106720/">https://www.ebi.ac.uk/chembl/compound_report_card/CHEMBL2106720/</a>                                       | Neuropsychiatric agent |
| 16   | D01605        |  | Metircane                     | -8.5                      | <a href="https://www.ebi.ac.uk/chembl/compound_report_card/CHEMBL1318341/">https://www.ebi.ac.uk/chembl/compound_report_card/CHEMBL1318341/</a>                                       | Cardiovascular agent   |
| 17   | D01056        |  | Benzbromarone                 | -8.48                     | <a href="https://www.ebi.ac.uk/chembl/compound_report_card/CHEMBL388590/">https://www.ebi.ac.uk/chembl/compound_report_card/CHEMBL388590/</a>                                         | Gout suppressant       |
| 18   | D01550        |  | Ciranafate                    | -8.39                     | <a href="https://www.ebi.ac.uk/chembl/compound_report_card/CHEMBL1591365/">https://www.ebi.ac.uk/chembl/compound_report_card/CHEMBL1591365/</a>                                       | Antifungal agent       |

Supp. Table S3: List of 11 small molecules energetically/structurally related to the saccharin molecule, which is among the ligands more similar to patulin and (*E*)-ascladiol, within the screened library.

| Rank | Chemical code | Structure                                                                           | Name                                            | Binding energy (kcal/mol) | ChEMBL/ChEBI                                                                                                                                    | Indication           |
|------|---------------|-------------------------------------------------------------------------------------|-------------------------------------------------|---------------------------|-------------------------------------------------------------------------------------------------------------------------------------------------|----------------------|
| 1449 | C10094        | 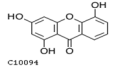   | 1,3,5-Trihydroxyxanthone                        | -6.99                     | <a href="https://www.ebi.ac.uk/chembl/compound_report_card/CHEMBL365234/">https://www.ebi.ac.uk/chembl/compound_report_card/CHEMBL365234/</a>   | /                    |
| 1450 | C10272        |    | Orchinol                                        | -6.99                     | <a href="https://www.ebi.ac.uk/chebi/searchId.do?chebiId=CHEBI:7779">https://www.ebi.ac.uk/chebi/searchId.do?chebiId=CHEBI:7779</a>             | /                    |
| 1451 | C10300        |    | Aristolindiquinone                              | -6.99                     | <a href="https://www.ebi.ac.uk/chebi/searchId.do?chebiId=CHEBI:2823">https://www.ebi.ac.uk/chebi/searchId.do?chebiId=CHEBI:2823</a>             | /                    |
| 1452 | C11018        |    | Azinphos-methyl                                 | -6.99                     | <a href="https://www.ebi.ac.uk/chembl/compound_report_card/CHEMBL530115/">https://www.ebi.ac.uk/chembl/compound_report_card/CHEMBL530115/</a>   | /                    |
| 1453 | C11432        |    | 1-Hydroxyphenanthrene                           | -6.99                     | <a href="https://www.ebi.ac.uk/chebi/searchId.do?chebiId=CHEBI:27528">https://www.ebi.ac.uk/chebi/searchId.do?chebiId=CHEBI:27528</a>           | /                    |
| 1454 | C12284        |    | Saccharin sodium anhydrous                      | -6.99                     | <a href="https://www.ebi.ac.uk/chembl/compound_report_card/CHEMBL2219743/">https://www.ebi.ac.uk/chembl/compound_report_card/CHEMBL2219743/</a> | /                    |
| 1455 | C14137        |    | 6-Hydroxyflavone                                | -6.99                     | <a href="https://www.ebi.ac.uk/chembl/compound_report_card/CHEMBL138649/">https://www.ebi.ac.uk/chembl/compound_report_card/CHEMBL138649/</a>   | /                    |
| 1456 | C14905        |   | 2-Chloro-beta-(4-chlorophenyl)phenethyl alcohol | -6.99                     | <a href="https://www.ebi.ac.uk/chembl/compound_report_card/CHEMBL138649/">https://www.ebi.ac.uk/chembl/compound_report_card/CHEMBL138649/</a>   | /                    |
| 1457 | C15210        |  | 1,1-Bis(4-hydroxyphenyl)propane                 | -6.99                     | <a href="https://www.ebi.ac.uk/chebi/searchId.do?chebiId=CHEBI:79723">https://www.ebi.ac.uk/chebi/searchId.do?chebiId=CHEBI:79723</a>           | /                    |
| 1458 | D00602        |  | Penbutolol sulfate                              | -6.99                     | <a href="https://www.ebi.ac.uk/chembl/compound_report_card/CHEMBL2361370/">https://www.ebi.ac.uk/chembl/compound_report_card/CHEMBL2361370/</a> | Cardiovascular agent |
| 1459 | D00773        |  | Metaxalone                                      | -6.99                     | <a href="https://www.ebi.ac.uk/chembl/compound_report_card/CHEMBL1079604/">https://www.ebi.ac.uk/chembl/compound_report_card/CHEMBL1079604/</a> | Muscle relaxant      |

Supp. Table S4: List of 11 small molecules structurally/energetically related to the umbelliferone molecule, able to control patulin production.

| Rank | Chemical code | Structure                                                                           | Name/<br>IUPAC                                 | Binding energy (kcal/mol) | ChEMBL                                                                                                                                          | Indication |
|------|---------------|-------------------------------------------------------------------------------------|------------------------------------------------|---------------------------|-------------------------------------------------------------------------------------------------------------------------------------------------|------------|
| 3147 | C09315        | 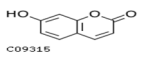   | Umbelliferone                                  | -6                        | <a href="https://www.ebi.ac.uk/chembl/compound_report_card/CHEMBL51628/">https://www.ebi.ac.uk/chembl/compound_report_card/CHEMBL51628/</a>     | /          |
| 3364 | D03799        |    | Dienogest                                      | -5.89                     | <a href="https://www.ebi.ac.uk/chembl/compound_report_card/CHEMBL1201864/">https://www.ebi.ac.uk/chembl/compound_report_card/CHEMBL1201864/</a> | /          |
| 3366 | C03431        |    | S-Inosyl-L-homocysteine                        | -5.89                     | <a href="https://www.ebi.ac.uk/chembl/db/compound/inspect/CHEMBL559715">https://www.ebi.ac.uk/chembl/db/compound/inspect/CHEMBL559715</a>       | /          |
| 3367 | C05648        |    | 5-Hydroxy-N-formylkynurenine                   | -5.88                     | <a href="https://www.ebi.ac.uk/chebi/searchId.do?chebiId=CHEBI:2065">https://www.ebi.ac.uk/chebi/searchId.do?chebiId=CHEBI:2065</a>             | /          |
| 3368 | C05851        |    | Coumarin                                       | -5.88                     | <a href="https://www.ebi.ac.uk/chembl/compound_report_card/CHEMBL6466/">https://www.ebi.ac.uk/chembl/compound_report_card/CHEMBL6466/</a>       | /          |
| 3369 | ZINC175734    |    | 6-Hydroxycoumarin                              | -5.88                     | <a href="https://zinc.docking.org/substances/ZINC000001757340/">https://zinc.docking.org/substances/ZINC000001757340/</a>                       | /          |
| 3370 | C08533        |    | Narciclasine                                   | -5.88                     | <a href="https://www.ebi.ac.uk/chembl/compound_report_card/CHEMBL98745/">https://www.ebi.ac.uk/chembl/compound_report_card/CHEMBL98745/</a>     | /          |
| 3371 | C09863        |   | Linalyl acetate                                | -5.88                     | <a href="https://www.ebi.ac.uk/chebi/searchId.do?chebiId=CHEBI:6469">https://www.ebi.ac.uk/chebi/searchId.do?chebiId=CHEBI:6469</a>             | /          |
| 3372 | C10938        |  | N,N-Diethylphenylacetamide                     | -5.88                     | <a href="https://www.ebi.ac.uk/chembl/compound_report_card/CHEMBL1887332/">https://www.ebi.ac.uk/chembl/compound_report_card/CHEMBL1887332/</a> | /          |
| 3373 | C11403        |  | (3S,6R)-6-Isopropenyl-3-methyl-2-oxo-oxepanone | -5.88                     | <a href="https://www.ebi.ac.uk/chebi/searchId.do?chebiId=CHEBI:64231">https://www.ebi.ac.uk/chebi/searchId.do?chebiId=CHEBI:64231</a>           | /          |
| 3374 | C13709        |  | 8-Cyclopentyl-1,3-dipropylxanthine             | -5.88                     | <a href="https://www.ebi.ac.uk/chembl/compound_report_card/CHEMBL183/">https://www.ebi.ac.uk/chembl/compound_report_card/CHEMBL183/</a>         | /          |

Supp. Table S5: List of 11 small molecules structurally/energetically related to the *p*-anisic acid, known for being able to inhibit Soc1.pdb used as a protein template for comparative modelling of *P. expansum* GMC oxidoreductase.

| Rank | Chemical code | Structure                                                                                     | Name/IUPAC                          | Binding energy (kcal/mol) | ChEMBL                                                                                                                                          | Indication                |
|------|---------------|-----------------------------------------------------------------------------------------------|-------------------------------------|---------------------------|-------------------------------------------------------------------------------------------------------------------------------------------------|---------------------------|
| 4389 | D02109        | 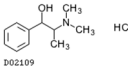<br>D02109   | dl-Methylephedrine hydrochloride    | -5.35                     | <a href="https://www.ebi.ac.uk/chebi/searchId.do?chebiId=CHEBI:79398">https://www.ebi.ac.uk/chebi/searchId.do?chebiId=CHEBI:79398</a>           | Cardiovascular agent      |
| 4390 | D03908        | <br>D03908   | Drinidene                           | -5.35                     | <a href="https://www.ebi.ac.uk/chembl/compound_report_card/CHEMBL4297145/">https://www.ebi.ac.uk/chembl/compound_report_card/CHEMBL4297145/</a> | Analgesic                 |
| 4391 | D04012        | <br>D04012   | Enviroxime                          | -5.35                     | <a href="https://www.ebi.ac.uk/chembl/compound_report_card/CHEMBL283403/">https://www.ebi.ac.uk/chembl/compound_report_card/CHEMBL283403/</a>   | Antiviral                 |
| 4392 | C01173        | <br>C01173   | 1,3,8-Trihydroxynaphthalene         | -5.34                     | <a href="https://www.ebi.ac.uk/chebi/searchId.do?chebiId=CHEBI:18393">https://www.ebi.ac.uk/chebi/searchId.do?chebiId=CHEBI:18393</a>           | /                         |
| 4393 | C01249        | <br>C01249   | 7,8-Dihydro-7,8-dihydroxykynurenate | -5.34                     | <a href="https://www.ebi.ac.uk/chebi/searchId.do?chebiId=CHEBI:17109">https://www.ebi.ac.uk/chebi/searchId.do?chebiId=CHEBI:17109</a>           | /                         |
| 4394 | C02519        | <br>C02519   | <i>p</i> -anisic acid               | -5.34                     | <a href="https://www.ebi.ac.uk/chembl/compound_report_card/CHEMBL21932/">https://www.ebi.ac.uk/chembl/compound_report_card/CHEMBL21932/</a>     | /                         |
| 4395 | C03493        | <br>C03493   | D-4-Hydroxyphenylglycine            | -5.34                     | <a href="https://www.ebi.ac.uk/chebi/searchId.do?chebiId=CHEBI:15695">https://www.ebi.ac.uk/chebi/searchId.do?chebiId=CHEBI:15695</a>           | /                         |
| 4396 | C05512        | <br>C05512   | Deoxyinosine                        | -5.34                     | <a href="https://www.ebi.ac.uk/chembl/compound_report_card/CHEMBL1229971/">https://www.ebi.ac.uk/chembl/compound_report_card/CHEMBL1229971/</a> | /                         |
| 4397 | C06304        | <br>C06304 | Camphene                            | -5.34                     | <a href="https://www.ebi.ac.uk/chembl/compound_report_card/CHEMBL510535/">https://www.ebi.ac.uk/chembl/compound_report_card/CHEMBL510535/</a>   | /                         |
| 4398 | C07714        | <br>C07714 | Isorbide mononitrate                | -5.34                     | <a href="https://www.ebi.ac.uk/chembl/compound_report_card/CHEMBL1311/">https://www.ebi.ac.uk/chembl/compound_report_card/CHEMBL1311/</a>       | /                         |
| 4399 | C08027        | <br>C08027 | Nalmefene                           | -5.34                     | <a href="https://www.ebi.ac.uk/chembl/compound_report_card/CHEMBL982/">https://www.ebi.ac.uk/chembl/compound_report_card/CHEMBL982/</a>         | Opioid receptor inhibitor |

Supp. Table S6: List of 11 small molecules structurally/energetically related to the ellagic acid, structurally related to the umbelliferone molecule, able to control patulin production.

| Rank | Chemical code | Structure                                                                                     | Name/<br>IUPAC           | Binding<br>energy<br>(kcal/mol) | ChEMBL/ChEBI/Zinc                                                                                                                               | Indication                              |
|------|---------------|-----------------------------------------------------------------------------------------------|--------------------------|---------------------------------|-------------------------------------------------------------------------------------------------------------------------------------------------|-----------------------------------------|
| 4998 | C07480        | 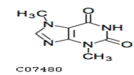<br>C07480   | Theobromine              | -4.99                           | <a href="https://www.ebi.ac.uk/chembl/compound_report_card/CHEMBL11114/">https://www.ebi.ac.uk/chembl/compound_report_card/CHEMBL11114/</a>     | Stimulant of the nervous system         |
| 4999 | C07770        | <br>C07770   | Sulbactam                | -4.99                           | <a href="https://www.ebi.ac.uk/chembl/compound_report_card/CHEMBL403/">https://www.ebi.ac.uk/chembl/compound_report_card/CHEMBL403/</a>         | Antimicrobial agent                     |
| 5000 | C08432        | <br>C08432   | Isoguanosine             | -4.99                           | <a href="https://www.ebi.ac.uk/chembl/compound_report_card/CHEMBL1688963/">https://www.ebi.ac.uk/chembl/compound_report_card/CHEMBL1688963/</a> | /                                       |
| 5001 | C10287        | <br>C10287   | Pterostilbene            | -4.99                           | <a href="https://www.ebi.ac.uk/chembl/compound_report_card/CHEMBL83527/">https://www.ebi.ac.uk/chembl/compound_report_card/CHEMBL83527/</a>     | /                                       |
| 5002 | C10496        | <br>C10496   | Sphagnum acid            | -4.99                           | <a href="https://www.ebi.ac.uk/chebi/searchId.do?chebiId=CHEBI:9220">https://www.ebi.ac.uk/chebi/searchId.do?chebiId=CHEBI:9220</a>             | /                                       |
| 5003 | C10788        | <br>C10788   | Ellagic acid             | -4.99                           | <a href="https://www.ebi.ac.uk/chembl/compound_report_card/CHEMBL6246/">https://www.ebi.ac.uk/chembl/compound_report_card/CHEMBL6246/</a>       | Antiproliferative and antioxidant agent |
| 5004 | C10866        | <br>C10866   | Scopoline                | -4.99                           | <a href="https://www.ebi.ac.uk/chebi/searchId.do?chebiId=CHEBI:9059">https://www.ebi.ac.uk/chebi/searchId.do?chebiId=CHEBI:9059</a>             | Anticholinergic effect                  |
| 5005 | D01124        | <br>D01124  | Zinc undecylenate        | -4.99                           | <a href="https://www.ebi.ac.uk/chembl/compound_report_card/CHEMBL4303341/">https://www.ebi.ac.uk/chembl/compound_report_card/CHEMBL4303341/</a> | Antifungal agent                        |
| 5006 | C13694        | <br>C13694 | Isoguvacine              | -4.99                           | <a href="https://www.ebi.ac.uk/chembl/compound_report_card/CHEMBL39071/">https://www.ebi.ac.uk/chembl/compound_report_card/CHEMBL39071/</a>     | GABA A receptor agonist                 |
| 5007 | C14411        | <br>C14411 | Dicyclopentadiene        | -4.99                           | <a href="https://www.ebi.ac.uk/chembl/compound_report_card/CHEMBL1570502/">https://www.ebi.ac.uk/chembl/compound_report_card/CHEMBL1570502/</a> | /                                       |
| 5008 | C14839        | <br>C14839 | Bromobenzene-3,4-epoxide | -4.99                           | <a href="https://www.ebi.ac.uk/chebi/searchId.do?chebiId=CHEBI:34589">https://www.ebi.ac.uk/chebi/searchId.do?chebiId=CHEBI:34589</a>           | /                                       |

Supp. Table S7: List of 11 small molecules structurally/energetically related to tyrosol, similar in structure to p-anisic acid (able to inhibit 5oc1.pdb) and benzaldehyde (substrate for 3gdn.pdb and 6lqy.pdb), which are among the best protein templates to be used for the comparative modelling of *P. expansum* GMC oxidoreductase.

| Rank | Chemical code | Structure                                                                           | Name/<br>IUPAC                                              | Binding<br>energy<br>(kcal/mol) | ChEMBL/ChEBI/Zinc                                                                                                                               | Indication |
|------|---------------|-------------------------------------------------------------------------------------|-------------------------------------------------------------|---------------------------------|-------------------------------------------------------------------------------------------------------------------------------------------------|------------|
| 5681 | C00881        | 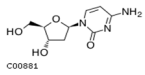   | 2'-Deoxycytidine                                            | -4.58                           | <a href="https://www.ebi.ac.uk/chembl/compound_report_card/CHEMBL661115/">https://www.ebi.ac.uk/chembl/compound_report_card/CHEMBL661115/</a>   | /          |
| 5682 | C01892        |    | Asparagusic acid                                            | -4.58                           | <a href="https://www.ebi.ac.uk/chembl/compound_report_card/CHEMBL3581910/">https://www.ebi.ac.uk/chembl/compound_report_card/CHEMBL3581910/</a> | /          |
| 5683 | C04673        |    | 1D-1-Guanidino-1-deoxy-3-dehydro-scyllo-inositol            | -4.58                           | <a href="https://www.ebi.ac.uk/chebi/searchId.do?chebiId=CHEBI:17845">https://www.ebi.ac.uk/chebi/searchId.do?chebiId=CHEBI:17845</a>           | /          |
| 5684 | C04796        |    | 4-(L-Alanin-3-yl)-2-hydroxy-cis,cis-muconate 6-semialdehyde | -4.58                           | <a href="https://www.ebi.ac.uk/chebi/searchId.do?chebiId=CHEBI:16098">https://www.ebi.ac.uk/chebi/searchId.do?chebiId=CHEBI:16098</a>           | /          |
| 5685 | C05332        |    | Phenylethylamine                                            | -4.58                           | <a href="https://www.ebi.ac.uk/chembl/compound_report_card/CHEMBL610/">https://www.ebi.ac.uk/chembl/compound_report_card/CHEMBL610/</a>         | /          |
| 5686 | C06044        |    | 4-Hydroxyphenylethanol (tyrosol)                            | -4.58                           | <a href="https://www.ebi.ac.uk/chembl/compound_report_card/CHEMBL53566/">https://www.ebi.ac.uk/chembl/compound_report_card/CHEMBL53566/</a>     | /          |
| 5687 | C06193        |   | Guanosine 3'-phosphate                                      | -4.58                           | <a href="https://www.ebi.ac.uk/chebi/searchId.do?chebiId=CHEBI:28072">https://www.ebi.ac.uk/chebi/searchId.do?chebiId=CHEBI:28072</a>           | /          |
| 5688 | C07216        |  | 3-Methylbenzyl alcohol                                      | -4.58                           | <a href="https://www.ebi.ac.uk/chebi/searchId.do?chebiId=CHEBI:27995">https://www.ebi.ac.uk/chebi/searchId.do?chebiId=CHEBI:27995</a>           | /          |
| 5689 | C07642        |  | Triethylenemelamine                                         | -4.58                           | <a href="https://www.ebi.ac.uk/chembl/compound_report_card/CHEMBL502384/">https://www.ebi.ac.uk/chembl/compound_report_card/CHEMBL502384/</a>   | /          |
| 5690 | C08556        |  | Miraxanthin-III                                             | -4.58                           | <a href="https://www.ebi.ac.uk/chebi/searchId.do?chebiId=CHEBI:6947">https://www.ebi.ac.uk/chebi/searchId.do?chebiId=CHEBI:6947</a>             | /          |
| 5691 | C08735        |  | 2-Chloro-4-hydroxy-6-amino-1,3,5-triazine                   | -4.58                           | <a href="https://www.ebi.ac.uk/chebi/searchId.do?chebiId=CHEBI:27797">https://www.ebi.ac.uk/chebi/searchId.do?chebiId=CHEBI:27797</a>           | /          |



Supp. Table S8: List of 11 small molecules structurally/energetically related to the gallic acid, similar in structure to the *p*-anisic acid (able to inhibit 5oc1.pdb) and benzaldehyde (substrate for 3gdn.pdb and 6lqy.pdb), which are among the best protein templates to be used for the comparative modelling of *P. expansum* GMC oxidoreductase.

| Rank | Chemical code | Structure                                                                           | Name/<br>IUPAC                                                 | Binding<br>energy<br>(kcal/mol) | ChEMBL/ChEBI/ Zink                                                                                                                              | Indication             |
|------|---------------|-------------------------------------------------------------------------------------|----------------------------------------------------------------|---------------------------------|-------------------------------------------------------------------------------------------------------------------------------------------------|------------------------|
| 6149 | C11159        | 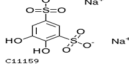   | 1,2-Dihydroxybenzene-3,5-disulfonic acid disodium salt (tiron) | -4.3                            | <a href="https://www.ebi.ac.uk/chembl/compound_report_card/CHEMBL110526/">https://www.ebi.ac.uk/chembl/compound_report_card/CHEMBL110526/</a>   | /                      |
| 6150 | C11283        |    | 2,4-Dinitrophenylhydrazine                                     | -4.3                            | <a href="https://www.ebi.ac.uk/chembl/compound_report_card/CHEMBL352799/">https://www.ebi.ac.uk/chembl/compound_report_card/CHEMBL352799/</a>   | /                      |
| 6151 | D00393        |    | Methanamine                                                    | -4.3                            | <a href="https://www.ebi.ac.uk/chembl/compound_report_card/CHEMBL1201270/">https://www.ebi.ac.uk/chembl/compound_report_card/CHEMBL1201270/</a> | Antibacterial activity |
| 6152 | D01607        |    | Theraptique                                                    | -4.3                            | <a href="https://www.ebi.ac.uk/chembl/compound_report_card/CHEMBL2104294/">https://www.ebi.ac.uk/chembl/compound_report_card/CHEMBL2104294/</a> | Respiratory stimulant  |
| 6153 | C00386        |    | Nalpha-(beta-alanyl)-L-histidine                               | -4.29                           | <a href="https://www.ebi.ac.uk/chembl/compound_report_card/CHEMBL242948/">https://www.ebi.ac.uk/chembl/compound_report_card/CHEMBL242948/</a>   | /                      |
| 6154 | C01424        |    | Gallic acid                                                    | -4.29                           | <a href="https://www.ebi.ac.uk/chembl/compound_report_card/CHEMBL288114/">https://www.ebi.ac.uk/chembl/compound_report_card/CHEMBL288114/</a>   | /                      |
| 6155 | C01468        |   | 4-Hydroxytoluene                                               | -4.29                           | <a href="https://www.ebi.ac.uk/chembl/compound_report_card/CHEMBL16645/">https://www.ebi.ac.uk/chembl/compound_report_card/CHEMBL16645/</a>     | /                      |
| 6156 | C02965        |  | D-Hexose 6-phosphate                                           | -4.29                           | <a href="https://www.ebi.ac.uk/chebi/searchId.do?chebiId=CHEBI:4195">https://www.ebi.ac.uk/chebi/searchId.do?chebiId=CHEBI:4195</a>             | /                      |
| 6157 | C03007        |  | N-Propanoylimidazole                                           | -4.29                           | <a href="https://www.ebi.ac.uk/chebi/searchId.do?chebiId=CHEBI:27449">https://www.ebi.ac.uk/chebi/searchId.do?chebiId=CHEBI:27449</a>           | /                      |
| 6158 | C03338        |  | 2,3,5-Trihydroxytoluene                                        | -4.29                           | <a href="https://www.ebi.ac.uk/chembl/compound_report_card/CHEMBL4102748/">https://www.ebi.ac.uk/chembl/compound_report_card/CHEMBL4102748/</a> | /                      |
| 6159 | C03387        |  | D-Glucurono-6,2-lactone                                        | -4.29                           | <a href="https://www.ebi.ac.uk/chebi/searchId.do?chebiId=CHEBI:17039">https://www.ebi.ac.uk/chebi/searchId.do?chebiId=CHEBI:17039</a>           | /                      |
